# Supplementary material
Source: Frontiers journal article supplement (https://www.frontiersin.org/articles/547354)
Supplement: Data_Sheet_1.pdf [file Data_Sheet_1.pdf]

## Supplementary materials

**Table S1.** Patient characteristics between different subgroups.

**Figure S1.** (A) Percentage change according to RECIST and the NPI; (B) The NPI in different RECIST groups. NPI, new prognostic index; RECIST, Response Evaluation Criteria in Solid Tumors; Based on RECIST, PR: partial response; SD: stable disease; and PD: progressive disease.

**Figure S2.** ROC curves of the NPI for RECIST (Figure S2A: PR and SD; S2B: SD and PD). NPI, new prognostic index; Based on the RECIST, PR: partial response; SD: stable disease; and PD: progressive disease; RECIST, Response Evaluation Criteria in Solid Tumors; ROC, receiver operating characteristic.

Figure S3. Survival analysis in subgroups according to PERCIST criteria in the training and validation set. MST, median survival time; PERCIST: Positron Emission Tomography Response Criteria in Solid Tumors. Based on PERCIST, PMR: partial response; SMD: stable disease; and PMD: progressive disease

Figure S4. Survival analysis based on RECIST and NPI stratified by EGFR-TKI, chemotherapy and chemoradiotherapy cohorts. EGFR, epidermal growth factor receptor; MST, median survival time; NPI, new prognostic index; RECIST, Response Evaluation Criteria in Solid Tumors; TKI, tyrosine kinase inhibitor. Based on RECIST, PR: partial response; SD: stable disease; and PD: progressive disease. Based on the NPI, NPR: partial response; NSD: stable disease; and NPD: progressive disease.

Table S1. Patient characteristics between different subgroups.

| Variables                                                                       | RECIST                 |                        |                       |              | NPI                     |                         |                        |              |
|---------------------------------------------------------------------------------|------------------------|------------------------|-----------------------|--------------|-------------------------|-------------------------|------------------------|--------------|
|                                                                                 | PR, No.(%)<br>(n = 44) | SD, No.(%)<br>(n = 63) | PD, No.(%)<br>(n = 9) | p values     | NPR, No.(%)<br>(n = 50) | NSD, No.(%)<br>(n = 57) | NPD, No.(%)<br>(n = 9) | p values     |
| Age (Median, range), years                                                      | 63.0 (32-81)           | 62.0 (28-88)           | 53.0 (34-64)          | <b>0.046</b> | 63.0 (39-88)            | 61.0 (28-87)            | 53.0 (34-78)           | 0.162        |
| Gender                                                                          |                        |                        |                       | 0.487        |                         |                         |                        | 0.333        |
| Male                                                                            | 37 (84.1)              | 48 (76.2)              | 8 (88.9)              |              | 39 (78.0)               | 45 (78.9)               | 9 (100.0)              |              |
| Female                                                                          | 7 (15.9)               | 15 (23.8)              | 1 (11.1)              |              | 11 (22.0)               | 12 (21.1)               | 0 (0.0)                |              |
| Smoking                                                                         |                        |                        |                       | 0.744        |                         |                         |                        | 0.549        |
| Yes                                                                             | 26 (59.1)              | 36 (57.1)              | 4 (44.4)              |              | 27 (54.0)               | 35 (61.4)               | 4 (44.4)               |              |
| No                                                                              | 18 (40.9)              | 27 (42.9)              | 5 (55.6)              |              | 23 (46.0)               | 22 (38.6)               | 5 (55.6)               |              |
| Stage                                                                           |                        |                        |                       | 0.333        |                         |                         |                        | 0.685        |
| IIIB                                                                            | 11 (25.0)              | 10 (15.9)              | 3 (33.3)              |              | 12 (24.0)               | 11 (19.3)               | 1 (11.1)               |              |
| IV                                                                              | 33 (75.0)              | 53 (84.1)              | 6 (66.7)              |              | 38 (76.0)               | 46 (80.7)               | 8 (88.9)               |              |
| Histology                                                                       |                        |                        |                       | <b>0.001</b> |                         |                         |                        | <b>0.009</b> |
| ADC                                                                             | 22 (50.0)              | 53 (84.1)              | 7 (77.8)              |              | 28 (56.0)               | 47 (82.5)               | 7 (77.8)               |              |
| SCC                                                                             | 22 (50.0)              | 10 (15.9)              | 2 (22.2)              |              | 22 (44.0)               | 10 (17.5)               | 2 (22.2)               |              |
| Time interval between PET <sub>0</sub> and PET <sub>1</sub> (Mean ± SD), months | 2.5 ± 0.8              | 2.3 ± 0.8              | 2.7 ± 0.9             | 0.182        | 2.5 ± 0.8               | 2.3 ± 0.8               | 2.6 ± 1.1              | 0.317        |
| EGFR types                                                                      |                        |                        |                       | 0.270        |                         |                         |                        | 0.223        |
| Deletion19/ L858R                                                               | 11 (25.0)              | 20 (31.7)              | 3 (33.3)              |              | 15 (30.0)               | 14 (24.6)               | 5 (55.6)               |              |
| Negative                                                                        | 19 (43.2)              | 34 (54.0)              | 5 (55.6)              |              | 22 (44.0)               | 32 (56.1)               | 4 (44.4)               |              |
| Unknown                                                                         | 14 (31.8)              | 9 (14.3)               | 1 (11.1)              |              | 13 (26.0)               | 11 (19.3)               | 0 (0.0)                |              |
| Treatment                                                                       |                        |                        |                       | 0.472        |                         |                         |                        | 0.100        |
| EGFR-TKI                                                                        | 11 (25.0)              | 16 (25.4)              | 4 (44.4)              |              | 13 (26.0)               | 13 (22.8)               | 5 (55.6)               |              |
| CT                                                                              | 29 (66.0)              | 45 (71.4)              | 5 (55.6)              |              | 32 (64.0)               | 43 (75.4)               | 4 (44.4)               |              |
| CRT                                                                             | 4 (9.0)                | 2 (3.2)                | 0 (0.0)               |              | 5 (10.0)                | 1 (1.8)                 | 0 (0.0)                |              |

ADC; adenocarcinoma; CRT, chemoradiotherapy; CT: chemotherapy; EGFR, epidermal growth factor receptor; MTV, metabolic tumor volume; NPI, new prognostic index; NPR: partial response based on NPI; NSD: stable disease based on NPI; NPD: progressive disease based on NPI; PD, progressive disease; PET, positron emission tomography; PR, partial response; RECIST, response evaluation criteria in solid tumors; SCC, squamous cell carcinoma; SD, standard deviation; TKI, tyrosine kinase inhibitor.

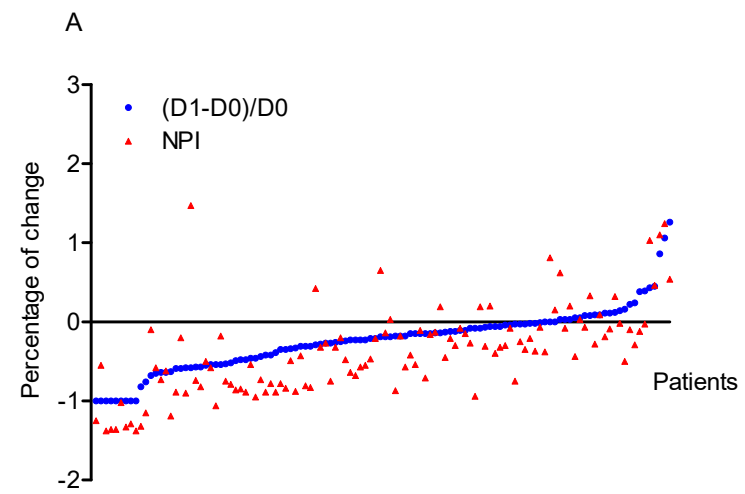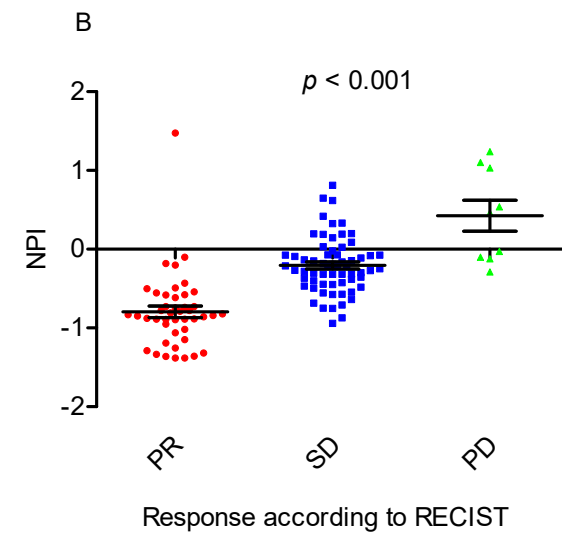

Figure S1

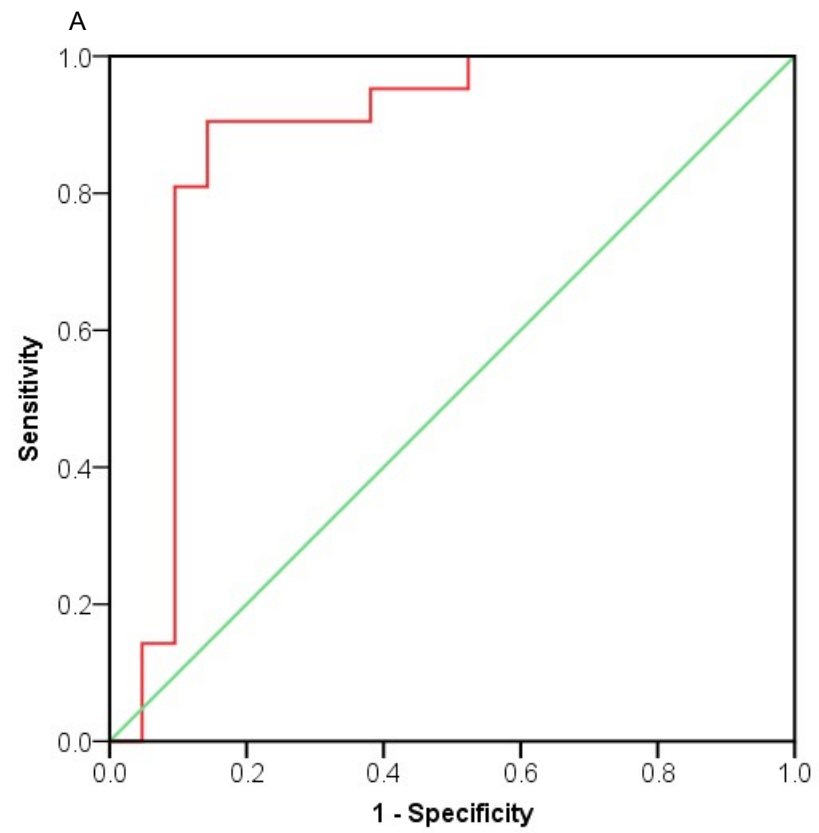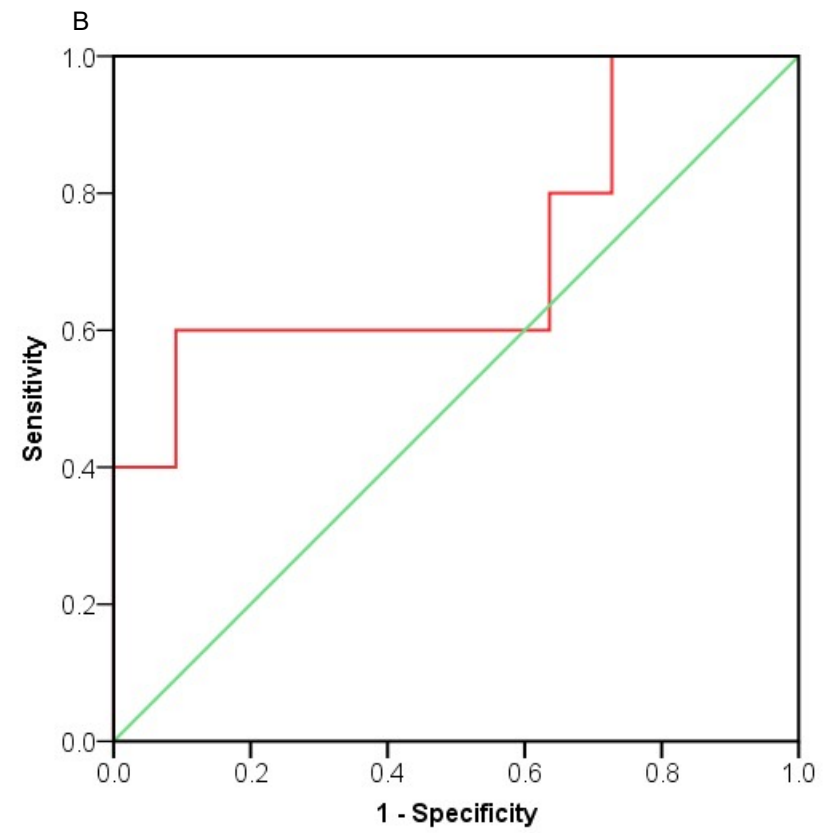

Figure S2

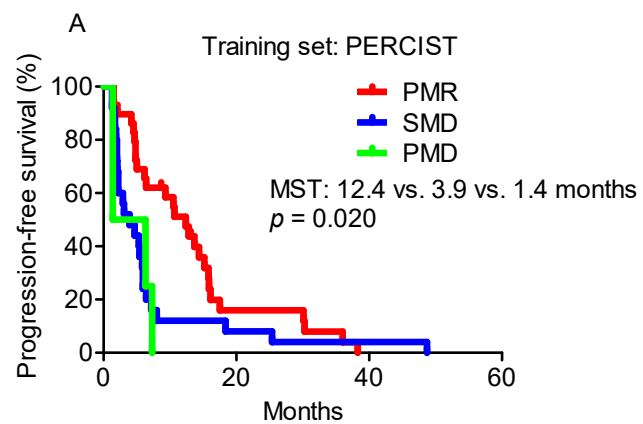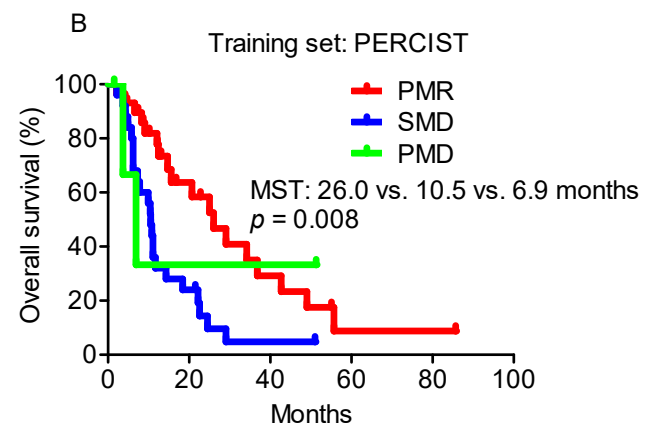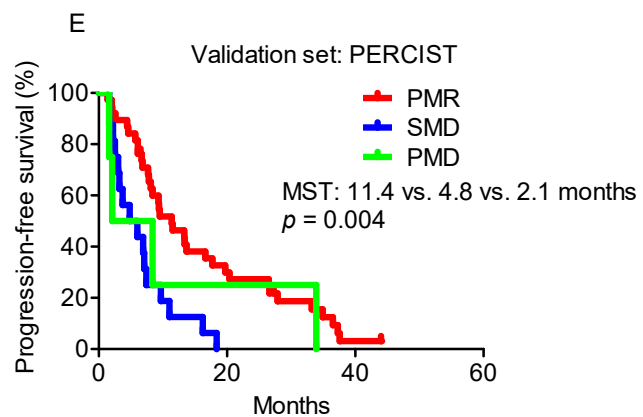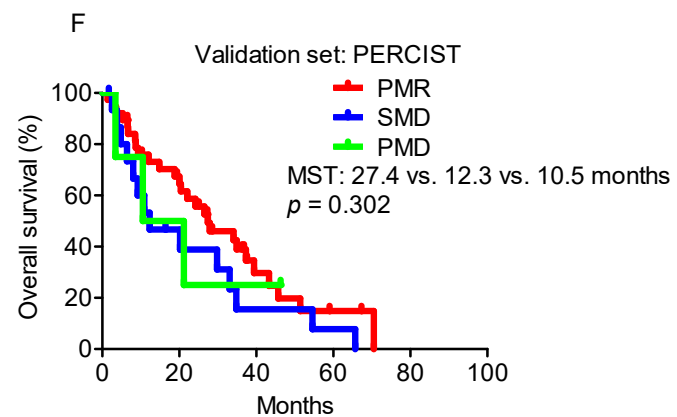

Figure S3

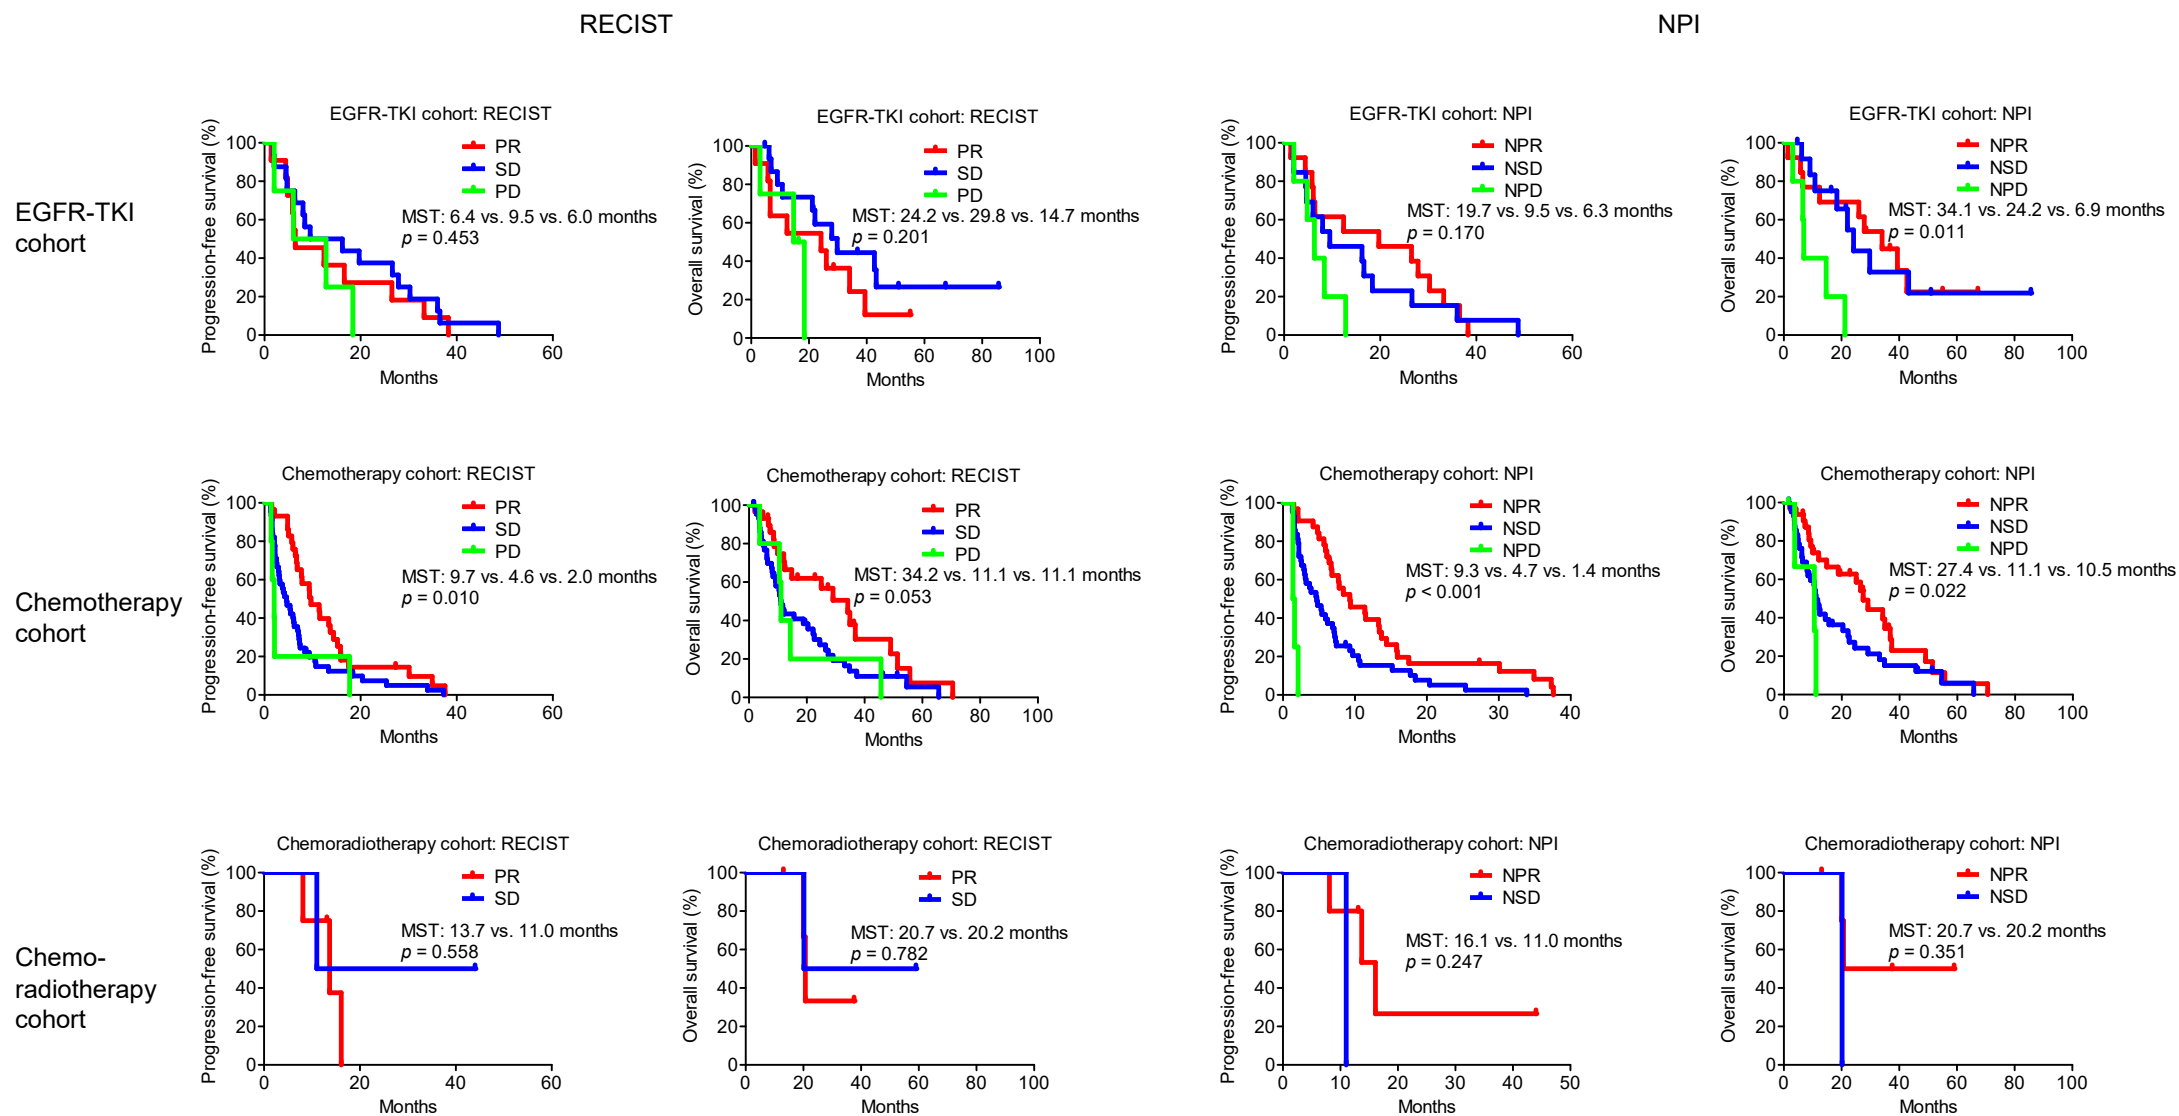

Figure S4
